# Supplementary material for: Association of baseline steroid use with long-term rates of infection and sepsis in the REGARDS cohort
Source: PubMed Central journal article supplement (PMC5508766; doi:10.1186/s13054-017-1767-1), 2017-07-13
Supplement: 13054_2017_1767_MOESM1_ESM.pdf [file 13054_2017_1767_MOESM1_ESM.pdf]

**APPENDIX 1: Piecewise Cox Regression Model Evaluating Association between Steroid Use and First Infection Events stratified by follow up time stratified by time in study**

| <b>Time Intervals</b> | <b>Exposure</b>  | <b>Total N</b> | <b>Event N</b> | <b>IR per 1000 py (95% CI)</b> | <b>Crude HR (95% CI)</b> | <b>Model 1 HR (95% CI)</b> | <b>Model 2 HR (95% CI)</b> | <b>Model 3 HR (95% CI)</b> |
|-----------------------|------------------|----------------|----------------|--------------------------------|--------------------------|----------------------------|----------------------------|----------------------------|
| <b>0 -1 years</b>     | Steroid Non-User | 29021          | 199            | 6.93 (6.03-7.97)               | <b>Ref</b>               | <b>Ref</b>                 | <b>Ref</b>                 | <b>Ref</b>                 |
|                       | Steroid User     | 669            | 23             | 35.57 (23.64-53.52)            | 5.14 (3.34-7.93)         | 4.85 (3.14-7.48)           | 4.65 (2.99-7.24)           | 2.92 (1.73-4.90)           |
| <b>1-2 years</b>      | Steroid Non-User | 28229          | 215            | 7.82 (6.84-8.93)               | <b>Ref</b>               | <b>Ref</b>                 | <b>Ref</b>                 | <b>Ref</b>                 |
|                       | Steroid User     | 618            | 13             | 22.00 (12.77-37.89)            | 2.82 (1.61-4.93)         | 2.60 (1.48-4.56)           | 2.47 (1.38-4.43)           | 1.93 (1.01-3.70)           |
| <b>2-5 years</b>      | Steroid Non-User | 26994          | 688            | 9.30 (8.64-10.03)              | <b>Ref</b>               | <b>Ref</b>                 | <b>Ref</b>                 | <b>Ref</b>                 |
|                       | Steroid User     | 566            | 44             | 30.16 (22.44-40.53)            | 3.26 (2.40-4.42)         | 3.16 (2.32-4.29)           | 3.11 (2.27-4.25)           | 2.39 (1.67-3.41)           |
| <b>&gt; 5 years</b>   | Steroid Non-User | 22312          | 1365           | 26.49 (25.12-27.93)            | <b>Ref</b>               | <b>Ref</b>                 | <b>Ref</b>                 | <b>Ref</b>                 |
|                       | Steroid User     | 412            | 53             | 58.55 (44.73-76.64)            | 2.30 (1.75-3.03)         | 2.19 (1.67-2.89)           | 2.20 (1.67-2.91)           | 1.79 (1.32-2.44)           |

Model 1 = Adjusted for demographics (age, race, income, education, income); Model 2 = Model 1 + Health Behaviors (Alcohol use, Smoking Status); Model 3 = Model 2 + Chronic Medical conditions (atrial fibrillation, Chronic Kidney Disease, Chronic Lung Disease, Coronary Artery Disease, Deep Vein Thrombosis, Diabetes, Dyslipidemia, Hypertension, Myocardial Infarction, Obesity, Peripheral Artery Disease, Stroke), Morisky Adherence Scale

**APPENDIX 2: Multivariable Logistic Regression Model Evaluating Association between Steroid Use and Sepsis Events Stratified by Morisky Adherence Scale and Propensity Scores**

| <b>Model</b>                                                   | <b>Crude Odds Ratio (95% CI)</b> | <b>Adjusted Odds Ratio (95% CI)</b> |
|----------------------------------------------------------------|----------------------------------|-------------------------------------|
| <b>Full Cohort (n= 2,600 )</b>                                 | 2.03 (1.36-3.03)                 | 2.11 (1.33-3.36)                    |
| <b>Stratified by Propensity Scores <sup>a</sup></b>            |                                  |                                     |
| Low Propensity for steroid use                                 | 4.82 (1.07-21.69)                | 5.68 (1.18-27.29)                   |
| Medium Propensity for steroid use                              | 2.24 (0.92-5.43)                 | 2.51 (1.00- 6.29)                   |
| High Propensity for steroid use                                | 1.78 (0.99-3.17)                 | 1.72 (0.93- 3.19)                   |
| <b>Stratified by Morisky Medication Adherence <sup>b</sup></b> |                                  |                                     |
| Good Medication Adherence                                      | 2.34 (1.44-3.79)                 | 2.49 (1.38-4.50)                    |
| Fair Medication Adherence                                      | 1.67 (0.66-2.14)                 | 1.71 (0.62-4.74)                    |
| Poor Medication Adherence                                      | 1.42 (0.42- 4.81)                | 2.40 (0.50-11.55)                   |

<sup>a</sup> Models adjusted for demographics (age, race, income, education, income), Health Behaviors (Alcohol use, Smoking Status, Chronic Medical conditions (atrial fibrillation, Chronic Kidney Disease, Chronic Lung Disease, Coronary Artery Disease, Deep Vein Thrombosis, Diabetes, Dyslipidemia, Hypertension, Myocardial Infarction, Obesity, Peripheral Artery Disease, Stroke), Morisky Adherence Scale

<sup>b</sup> Model adjusted as stated above except Morisky Adherence Scale was replaced by Propensity Scores
